***Deletion of sulfate transporter SUL1 extends yeast replicative lifespan via reduced PKA signaling instead of decreased sulfate uptake***

Juan Long<sup>1,2</sup>, Meng Ma<sup>1,2</sup>, Yuting Chen<sup>2</sup>, Bo Gong<sup>4#</sup>, Yi Zheng<sup>1,2#</sup>, Hao Li<sup>3#</sup>, Jing Yang<sup>1,2#</sup>

<sup>1</sup> *Department of Health Management & Institute of Health Management, Sichuan Provincial People's Hospital, University of Electronic Science and Technology of China, Chengdu, China*

<sup>2</sup> *Laboratory of Aging Research, School of Medicine, University of Electronic Science and Technology of China, Chengdu, China*

<sup>3</sup> *Department of Biochemistry and Biophysics, University of California San Francisco, CA, USA*

<sup>4</sup> *Department of Laboratory Medicine, Sichuan Academy of Medical Sciences and Sichuan Provincial People's Hospital, School of Medicine, University of Electronic Science and Technology of China, Chengdu 610072, Sichuan, China*

#: To whom correspondence may be addressed.

Email: [gongbo@med.uestc.edu.cn](mailto:gongbo@med.uestc.edu.cn); [yi\\_zheng@uestc.edu.cn](mailto:yi_zheng@uestc.edu.cn); [haoli@genome.ucsf.edu](mailto:haoli@genome.ucsf.edu); [yangjing1977@uestc.edu.cn](mailto:yangjing1977@uestc.edu.cn).

## **Abstract**

The regulation of cellular metabolism and growth in response to nutrient availability is essential for cell survival and can significantly impact lifespan. Central to the regulation is a class of transporters that sense and transport specific nutrients and transduce the signal downstream to control genes responsible for growth and survival. In this work, we identified SUL1, a plasma membrane transporter responsible for regulating the entry of extracellular sulfate in *S. cerevisiae*, as a key gene for regulating lifespan. We performed a systematic analysis to delineate the

downstream mechanism underlying the lifespan extension by SUL1 deletion. Surprisingly, we found that the lifespan extending effect of SUL1 deletion is not caused by decreased sulfate transport. SUL1 deletion mutant exhibited decreased PKA signaling, resulting in a range of downstream effects, including increased stress-protective trehalose and glycogen, increased nuclear translocation of MSN2 and elevated expression of general stress response genes, enhanced autophagy, and reduced expression of amino acid biosynthetic and ribosomal genes. We show that the observed increase in lifespan is dependent on MSN2 and autophagy pathways. Our findings exemplify the influence of nutrient signaling, rather than the nutrient itself, on lifespan regulation and further substantiate the pivotal role of the PKA pathway in this process.

## **Keywords**

SUL1, PKA activity, stress response, MSN2, longevity

## **Introduction**

The metabolism of nutrients is known to have an important regulatory impact on the physiology and growth of organisms (González and Hall, 2017). Reduced food intake has been shown to extend the lifespan across many eukaryotes, such as yeast, worms, flies, and mice (Carmona and Michan, 2016; Green et al., 2022). The regulation of longevity has been documented to encompass distinct routes and regulators, such as the integrated stress response (ISR), AMPK signaling pathway, and mTORC1 signaling pathway. These pathways are activated in response to various nutrient restriction stresses including glucose, amino acid, and lipid restriction (Loewith and Hall, 2011; Wullschleger et al., 2006). Eukaryotic cells have evolved distinct mechanisms for nutrition sensing and transportation in order to exert regulatory control over various cellular targets. The deregulation of nutrient sensing, which is widely acknowledged as a hallmark of aging, can influence lifespan and healthspan in a variety of animal models (Acosta-Rodríguez et al., 2022; Duran-Ortiz et al., 2021; Fan et al., 2021).

The involvement of several nutrient transporters has lately been implicated in the mediation of aging or age-related illnesses. For example, the inhibition of glucose transporter SGLT-2 has the potential to delay cellular senescence (La Grotta et al., 2022). The amino acid transporter SLC36A4 can regulate the mTORC1 signaling in lysosomes of retinal pigmented epithelial cells through its regulation of the amino acid pool (Shang et al., 2017). Apo E, which serves as a constituent of plasma lipoproteins responsible for lipids transportation, plays a role in several neurodegenerative disorders (Martens et al., 2022). In addition to organic nutrients, organisms are subject to the regulation of vast amount of inorganic nutrients including phosphate and sulfate. However, the impact of these nutrients transporters on longevity remains largely unexplored.

The yeast *S. cerevisiae* has been widely used as a model organism in the study of molecular mechanisms underlying aging, as well as evolutionarily conserved signal pathways. Yeast cells possess a diverse array of inorganic nutrient sensing systems that facilitate rapid adaptation to fluctuating environment. For instance, the MEP2 system detects ammonium (Van Nuland et al., 2006), the PHO84 system senses phosphate (Giots et al., 2003), the FTR1 system is involved in iron sensing, the ZRT1 system detects zinc (Schothorst et al., 2017), and the SUL1/SUL2 system that senses and transport sulfate (Kankipati et al., 2015). Moreover, there is substantial evidence from higher eukaryotes indicating the presence of transporters that exhibit an extra role in nutrient-sensing (Hyde et al., 2007; Pérez-Torras et al., 2013; Walch-Liu and Forde, 2008). Further investigation is required to examine the impact of inorganic nutrients transporters on lifespan and the underlying mechanisms. Considering the crucial role of sulfur-containing substances in regulating lifespan, such as hydrogen sulfide, and methionine (Choi et al., 2019), the sulfate transporters can serve as a good model for such investigation.

Sulfur is widely recognized as a crucial nutrient that exerts significant regulatory influences on cellular metabolism and proliferation (Maw, 1963). Sulfur is mostly absorbed and stored within cells in the form of sulfate, facilitated by specialized membrane transporters (Cherest et al., 1997). In yeast, the process of enzymatic

reduction converts sulfate to sulfide, which is then integrated into organic molecules by the sulfate assimilation pathway (SAP)(Thomas and Surdin-Kerjan, 1997). This pathway involves the utilization of two high-affinity transporters SUL1 and SUL2 (Khurana et al., 2000). Both SUL1 and SUL2 have been identified as transceptors (Kankipati et al., 2015), which can sense sulfur signals and exhibit a robust response to sulfur deprivation by upregulating sulfate transport. Additionally, they play a crucial role as mediators in the activation of the protein kinase A (PKA) pathway in response to nutrient stimuli, thereby governing various cellular processes (Thevelein and de Winde, 1999).

In this study, we examined the regulatory mechanism of SUL1 in relation to yeast longevity. We found that SUL1, instead of SUL2 deletion, significantly extends yeast replicative lifespan, and the increase of lifespan resulting from the deletion of SUL1 is not contingent upon sulfate transport. The SUL1 mutant strain displayed several traits indicative of decreased PKA activity, including accumulation of stress-protective carbohydrates, increase of MSN2 nuclear localization and up-regulation of stress response genes, and down-regulation of ribosomal gene expression. We show that lifespan extension depends on the stimulation of MSN2 transcriptional activity and autophagy. Our study provides an example where downstream signaling of nutrient instead of the nutrient itself influences lifespan, which may be general for other nutrient transceptors. Our findings also support PKA pathway's important role for lifespan regulation.

## Methods

### Yeast strains, plasmids, and media

All *S. cerevisiae* strains used in this study are the BY4741 (*MATa his3 $\Delta$ 1 leu2 $\Delta$ 0 met15 $\Delta$ 0 ura3 $\Delta$ 0*) background and are listed in Table S1.

Knockout strains were generated by transforming with a PCR product encoding the kanamycin-resistance (KanR) cassette or HisMX6 cassette to replace the ORF of interest. EGFP-labeled strains were generated by inserting an EGFP-HisMX6 cassette amplified from the pYM-N18-GFP-HisMX6 plasmid into the C-terminal of the target

gene. All the used primers are provided in Table S2.

The yeast strains were cultivated in YPD complete medium containing 2% glucose, 2% peptone, 1% yeast extract, or synthetic complete medium supplemented with 0.03% essential amino acids and 2% glucose. The glucose restriction media contained the same components as the complete medium except for a reduced concentration of glucose at 0.05%. Yeast strains were grown in selective minimal media at 30°C and shaken at 250~300 rpm.

### **Replicative lifespan analysis**

The strains were pre-cultured overnight on YPD plates. Lifespan analyses were conducted using micromanipulation, following the previously described protocol (Lin et al., 2000). All micromanipulation dissections were performed at laboratory temperature.

### **RNA-seq and differential expression gene analysis**

Yeast in the logarithmic growth phase (~0.5 OD<sub>600</sub>) was harvested, and RNA-seq experiments were conducted following the previously described protocol on BGISEQ-500 (Beijing Genomics institution). The sequencing data discussed in this publication have been deposited with the NCBI Gene Expression Omnibus and are accessible through GEO Series accession number GSE215287 (<http://www.ncbi.nlm.nih.gov/geo/query/acc.cgi?acc=GSE215287>). The gene expression levels were compared across different samples using Fragments Per Kilobase Million (FPKM) values. The log<sub>2</sub> ratio of the FPKM value was used to determine the fold change in gene expression for each sample. The R software was then used to carry out a differential expression analysis between the samples (Sun et al., 2013).

### **RNA extraction, reverse transcription and real-time qPCR**

The total RNA was extracted using the TRIzol reagent (Invitrogen, #15596026) following the manufacturer's instructions. Subsequently, residual DNA was removed using gDNA wiper mix, and 1µg of total RNA was reverse-transcribed to cDNA utilizing HiFiScript gDNA Removal RT MasterMix (CW BIO, Jiangsu, China). Quantitative real-time PCR was performed on the 7500 Fast Real-Time PCR System

(Applied Biosystems, Foster City, CA, USA) with 2 x SuperFast Universal SYBR Master Mix (CWBIO, Jiangsu, China). Actin was used as as the internal control for data analysis. The relative expression of each mRNA was calculated using the  $2^{-\Delta\Delta CT}$  method. Each measurement consisted of three technical replicates. All primer sequences were included in Supplementary Table S2.

### **Transcriptional factors prediction of DEGs**

We utilized the regulator function module of the Saccharomyces Genome Database (SDG) to identify transcription factors associated with differentially expressed genes (DEGs) in our transcriptome sequencing data, and ranked their frequency. Transcription factors with higher frequencies were considered more likely to be common regulators of DEGs. The regulatory network of these transcription factors on DEGs was visualized using Cytoscape 3.7.1.

### **Glycogen and trehalose quantification**

A single clone of yeast was inoculated in 5 mL of YPD medium and incubated overnight at 30°C, 200 rpm. After being diluted to a concentration ( $OD_{600} = 0.1$ ), the culture was incubated for four hours at the same temperature and speed until it entered the exponential growth phase. The cells were rinsed with 1 ml of sterile ice water and the cell concentration was quantified.  $1 \times 10^8$  cells from the cell suspension were transferred to a 96-well plate, centrifuged and the supernatant was then removed. After being resuspended in 125  $\mu$ l of  $Na_2CO_3$ , the cells were incubated at 95°C for 3 hours while being rotated occasionally. The plates were then cooled to room temperature, the cell suspension was thoroughly mixed before equally divided into two new plates. There were three technical replicates for each strain.

For glycogen measurements, each reaction solution was prepared by combining 188  $\mu$ l of amyloglucosidase buffer, 62  $\mu$ l of cell suspension, and 10  $\mu$ l of freshly prepared *Aspergillus niger*  $\alpha$ -amyloglucosidase solution (~70 U/mg) in a sodium acetate buffer (pH = 5.2) at a concentration of 0.2 M. The plates were mixed thoroughly and incubated overnight at 57°C.

For trehalose measurements, each reaction solution was prepared by adding 188  $\mu$ l of trehalase buffer, 62  $\mu$ l of cell suspension, and 10  $\mu$ l of porcine trehalase solution

(~0.007 U) diluted threefold with 0.2 M sodium acetate buffer (pH = 5.2). The plates were then incubated overnight at 37°C.

The quantification of glucose released in the preceding procedures was performed using the Glucose Assay Kit (Sigma-Aldrich, #MAK263) in accordance with the instructions provided by the manufacturer.

### **Single-cell time-lapse imaging**

The cells were cultured overnight in synthetic complete media containing 2% glucose at 30°C until they reached an optical density of approximately 1.0. Subsequently, the cells were diluted ten-fold and further cultivated in a shaker at 30°C for an additional 4 to 6 hours before being loaded into the microfluidic device. The microfluidic device was employed to track single cell, following the previously described protocols (Chen et al., 2020; Xie et al., 2012). The microfluidic chip used for this experiment was generously provided by Prof. Chunxiong Luo from PKU.

### **Fluorescence imaging**

Yeast cells in the logarithmic growth phase was used to observe the nuclear localization of MSN2-EGFP or MSN4-EGFP. The nuclei were stained with DAPI at a final concentration of 2.5 µg/ml and incubated for 30 min at room temperature. Images were captured using Zeiss Axio Observer 7, and image analysis was conducted using the ImageJ software. In brief, the quantification of protein expression abundance in each cell is determined by subtracting the background intensity from the green fluorescence intensity. In each experiment, a minimum of 100 cells were subjected to analysis.

### **Flow cytometry**

The EGFP-labeled strains were incubated overnight, followed by being diluted to an OD<sub>600</sub> equals to 0.01. The cultures were then grown for an additional duration of 2-4 hours until they attained an OD<sub>600</sub> of approximately 0.05 in a 96-well plate. Subsequently, flow cytometry was employed to quantify the EGFP signals (FITC channel) in each sample at regular hourly intervals. The cellular concentration of EGFP was assessed by normalizing the EGFP signal with cell size using a forward scattering signal (FSC channel) for individual cells. Mean fluorescence intensity was

utilized to compare the differences.

### **Statistical analysis**

The replicative lifespan was analyzed using the Kaplan-Meier method, the survival differences were determined by the log-rank test. Other group differences were evaluated with Student's t-test. The statistical analyses were conducted using SPSS 22.0 and GraphPad Prism 6. Statistical significance was considered at  $p$  value  $< 0.05$ .

## **Results**

### **SUL1 deletion increases yeast RLS in a sulfate metabolism independent way**

In budding yeast, SUL1 and SUL2 serve as two plasma membrane transporters responsible for regulating the import of extracellular sulfate. The SUL1 functions as a transporter with a high affinity for sulfate (Cherest et al., 1997). Sulfate is converted into various sulfur-containing substances, including methionine, cysteine, glutathione, and S-adenosylmethionine through the sulfate assimilation pathway (SAP) (Marzluf, 1997). SUL2 is the homolog of SUL1 and may function as a redundant sulfate transporter. We first measured the RLS of SUL1 deletion and found that the mutant has a significantly extended lifespan (Fig. 1A).

We then seek out to understand the mechanism underlying the lifespan extension. Our initial guess was SUL1 deletion decreases the sulfate transport, limiting the availability of sulfur, thus extends lifespan through a mechanism similar to methionine (which also contains sulfur) restriction.

In order to investigate the influence of sulfur metabolism on the extension of lifespan in the SUL1 knockout strain, we generated three strains that modulate the SAP at various levels. These strains include a SUL2 knockout strain, a site-directed mutant strain SUL1<sup>E427Q</sup>, which has been previously demonstrated to disrupt sulfate transport (Kankipati et al., 2015), and a MET3 knockout strain that specifically affects a key enzyme in the SAP (Thomas and Surdin-Kerjan, 1997). We found that inhibition of the sulfur-transporting function of SUL1 (SUL1<sup>E427Q</sup>) does not extend lifespan. In addition, neither the depletion of SUL2 dependent sulfate transport nor the disruption of SAP through MET3 deletion leads to increase in the replicative lifespan



of yeast cells (Fig. 1B). These data suggest that lifespan extension by SUL1 deletion is not caused by decreased sulfate uptake.

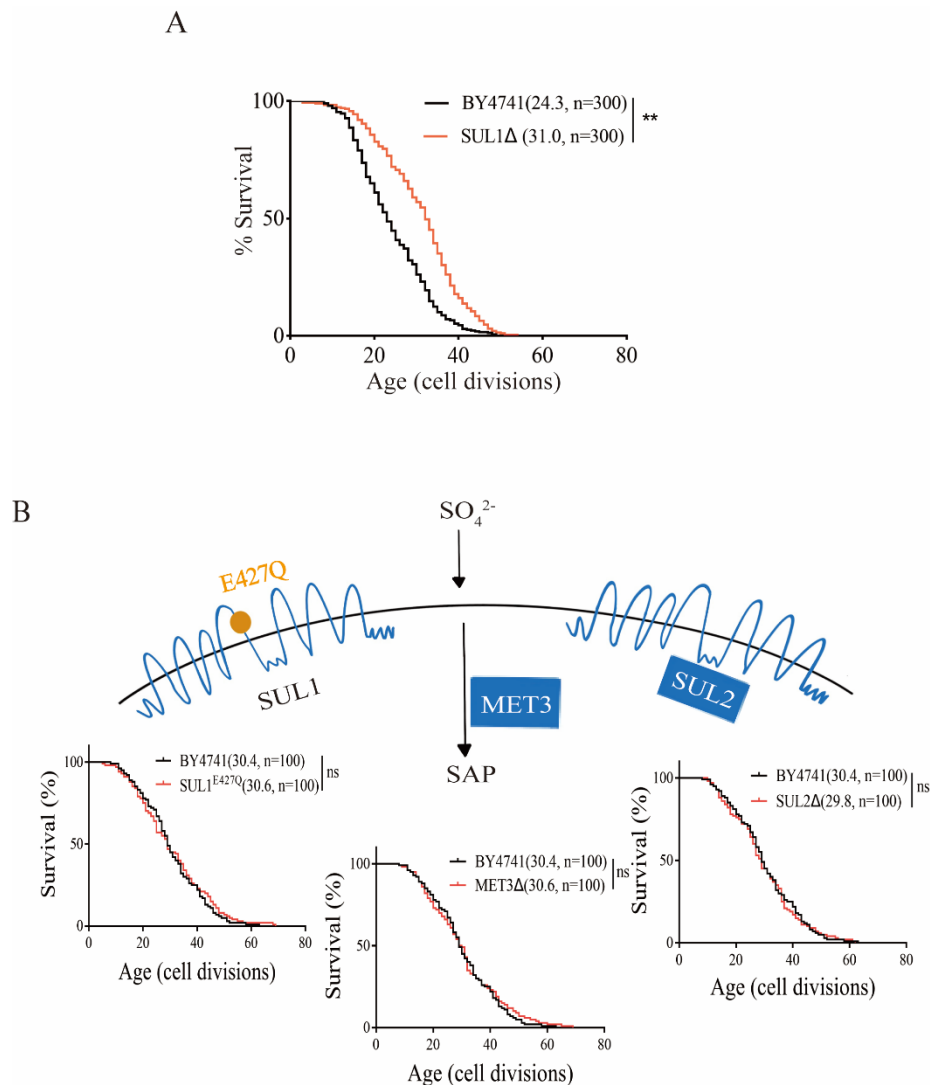

**Figure 1. The lifespan extension of SUL1Δ mutant is not caused by changes in sulfate transport/metabolism.** (A) Deletion of SUL1 gene significantly extended the replicative lifespan of yeast *S. cerevisiae*. Numbers in parentheses indicate the average life span and the number of cells measured. \*\*:  $P < 0.01$ . (B) Lifespan is not altered by three targeted genetic interventions that change sulfate transport/metabolism: a. mutation of the amino acid residue of SUL1 (E427Q) that abolishes the activity of sulfate transport; b. inactivation of MET3, the key enzymes of SAP; c. deletion of SUL2 (a homolog of SUL1). Survival curves for the WT and SUL1<sup>E427Q</sup>, MET3Δ or SUL2Δ strains are shown.

## **SUL1 deletion induces global transcriptional changes indicative of conserved longevity promotion mechanisms**

In order to gain a deeper understanding of the mechanisms that contribute to the extension of life span in *SUL1* $\Delta$  strains, we conducted a comprehensive analysis of the global gene expression profiles of the *SUL1* $\Delta$  strains in comparison with the wild-type strains through RNA-seq. We observed a wide range of changes in the transcript levels of genes in strains lacking *SUL1* (Fig. 2A). A total of 182/57 genes were upregulated/downregulated ( $|\text{Log}_2 \text{FC}| > 0.5$ ) (Fig. 2A). Genes up-regulated are significantly enriched for several biological processes (BP), such as transposition, RNA-mediated regulation, ascospore wall assembly, stress response, protein catabolic process, and carbohydrate metabolism (Fig. 2B & 2C left). On the other hand, genes down-regulated are significantly enriched for cellular amino acid biosynthesis, metabolic processes, and ribosome biogenesis (Fig. 2B & 2C right).

Increase in stress response and production of carbohydrates such as trehalose are seen as beneficial factors for promoting longevity (Zhang and Cao, 2017). Additionally, the suppression of protein biogenesis and ribosomal function are also known to extend lifespan (McCormick et al., 2015; Steyfkens et al., 2018). Thus our gene expression analysis suggests that the deletion of the *SUL1* gene activates general and conserved anti-aging mechanisms to extend lifespan.

We observed considerable upregulation of several stress response genes, specifically those controlled by *MSN2*, in the *SUL1* deletion mutant. These genes are involved in the synthesis of trehalose and glycogen, such as *TPS1*, *TPS2*, *GSY2*, and others (Fig. 2C, left). To identify potential transcriptional regulators, we performed association analysis between TFs and differentially expressed genes (DEG) (See Methods). We observed that a number of up-regulated DEG in *SUL1* mutant are associated with six stress related transcription factors, namely *SUA7*, *MSN2*, *IXR1*, *FKH1*, *FKH2*, and *SFP1* (Fig. 2D). Interestingly, besides *MSN2* which is well known general stress response regulator (Gasch et al., 2000). We also identified *IXR1*, a transcriptional repressor that regulates hypoxic genes during normoxia, suggesting that *SUL1* deletion induces gene expression program similar to diauxic shift, a

phenomenon also observed in a constitutively active MSN2 mutant that mimics lower PKA activity (Pfanzagl et al., 2018).

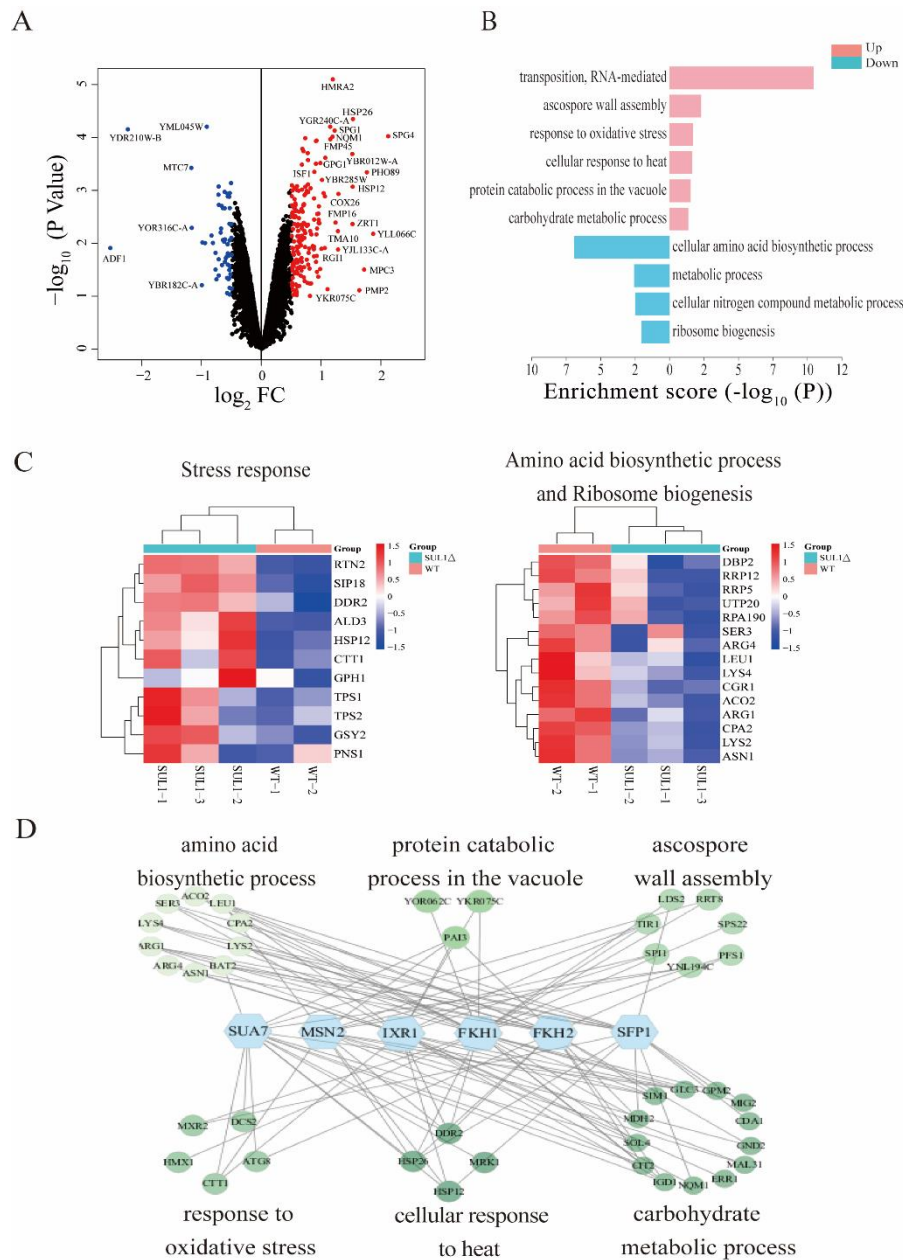

**Figure 2. Common longevity pathways may contribute to the RLS extension of *SUL1* deletion mutant.** (A) Volcano plot of the DEG between the *SUL1Δ* and WT strains. The transcriptomics analysis was performed in the *SUL1Δ* and WT strains.  $\log_{10}$  of the *P* values is plotted against the  $\log_2$  FC of the FPKM. (B) Biological processes enriched in the DEGs between the *SUL1Δ* and WT strains. The up-regulated genes ( $P < 0.1$ ,  $\log_2$  FC  $> 0.5$ ) and the down-regulated genes ( $P < 0.1$ ,  $\log_2$  FC  $< -0.5$ ) were used for the analysis. (C) Heatmaps showing

changes of stress response (left) and amino acid biosynthetic and ribosome biogenesis genes (right). (D) Association analysis of the potential transcription factors and the DEGs in the enriched biological processes (See Methods).

### **SUL1 deletion inhibits the PKA activity and promotes the nuclear translocation of MSN2**

Based on our observations, it is evident that the lifespan extension in the SUL1 mutant does not depend on reduced sulfate transport. It has been reported that SUL1 exhibits the ability to react to environmental stress via signaling through the PKA pathway (Kankipati et al., 2015). Under conditions of nutrient starvation, yeast cells display traits associated with decreased activity of PKA, including the accumulation of stress-protective carbohydrates such as glycogen and trehalose, enhanced resistance to stress, increased expression of stress response gene, and decreased expression of ribosomal genes (Kankipati et al., 2015). Additionally, the transcription factors MSN2/MSN4, which are involved in stress resistance, are suppressed by PKA activity. The RNA profile data obtained in our study suggests that the deletion of the SUL1 gene is associated with a decrease in PKA activity and an increase in the expression of genes targeted by MSN2. Thus, to understand the downstream mechanisms for the lifespan extension by SUL1 deletion, we turned our attention to the PKA signaling pathway and its influence on the transcriptional control of MSN2.

The down-regulation of the PKA pathway occurs in yeast cells when they are deprived of a crucial nutrient (Thevelein and de Winder, 1999). This down-regulation leads to adaptive stress protection and the accumulation of trehalose and glycogen (Lillie and Pringle, 1980). Consequently, trehalose and glycogen serve as a practical indicator for evaluating the activity of the PKA pathway *in vivo* (Schepers et al., 2012).

We found that the mRNA levels of TPS1 (Trehalose-6-P synthase) and stress-related genes were notably elevated in the SUL1 deletion mutant (Fig.3A). Additionally, the concentrations of trehalose and glycogen were significantly increased, indicating a decrease of PKA activity due to SUL1 deletion (Fig. 3B).

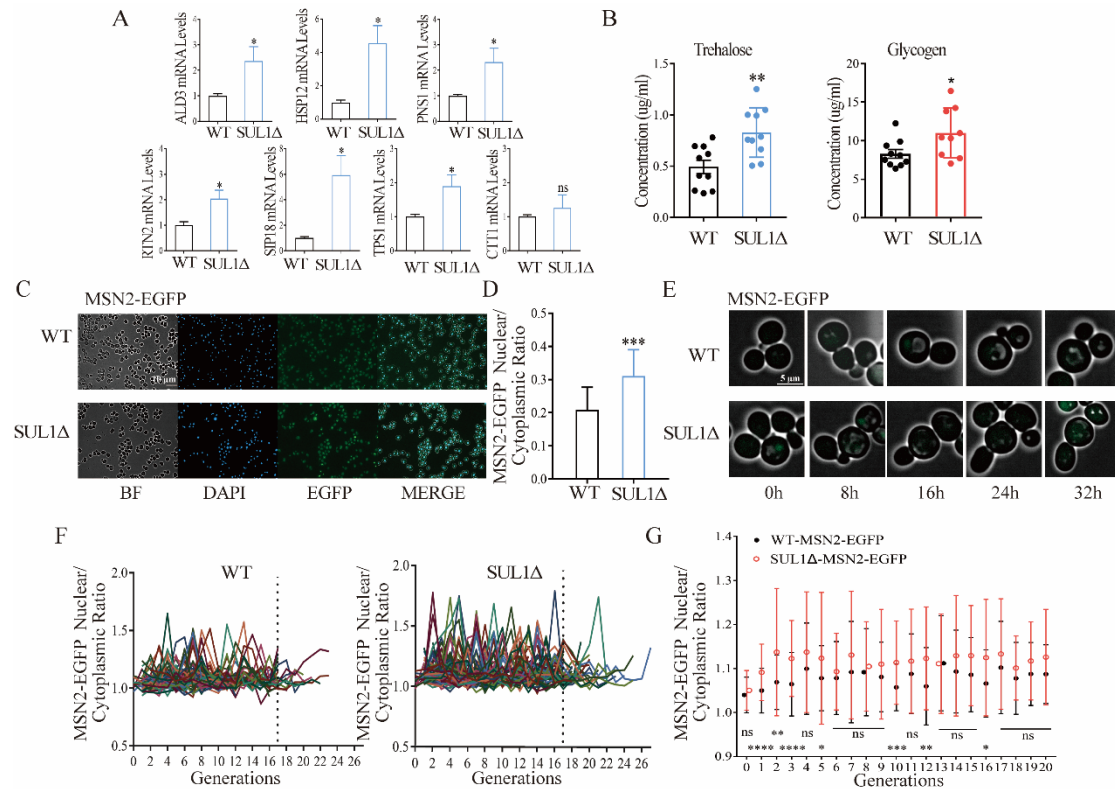

**Figure 3. SUL1 deletion inhibits the PKA pathway and increases the translocation of MSN2 into nucleus.** (A) The mRNA levels of several stress response genes and trehalose synthesis. ns: not significant; \*:  $P < 0.05$ . (B) The concentrations of trehalose and glycogen in WT and  $SUL1\Delta$  strains. \*:  $P < 0.05$ ; \*\*:  $P < 0.01$ . (C) Representative images of EGFP-labeled endogenous MSN2 in WT and  $SUL1\Delta$  strains during the exponential growth phase. BF: bright field. Scale bars: 10  $\mu\text{m}$ . (D) The ratio of the mean fluorescence intensity of MSN2-EGFP in the nucleus vs. that of the total cell. Bars represent mean  $\pm$  SD,  $n = 100$ . \*\*\*:  $P < 0.001$ . (E) Representative time-lapse images of MSN2-EGFP in WT and  $SUL1\Delta$  strains. Scale bars: 5  $\mu\text{m}$ . (F) The normalized nuclear/cytoplasmic fluorescence intensity ratio of MSN2-EGFP as a function of age in the WT and  $SUL1\Delta$  strains (number of cells WT:  $n = 80$ ;  $SUL1\Delta$ :  $n = 80$ ). (G) Comparison of the nuclear/cytoplasmic mean fluorescence intensity ratio of MSN2-EGFP as a function of age in WT and  $SUL1\Delta$  strains. Bars represent mean  $\pm$  SD,  $n = 80$ . ns: not significant; \*:  $P < 0.05$ ; \*\*:  $P < 0.01$ ; \*\*\*:  $P < 0.001$ ; \*\*\*\*:  $P < 0.0001$ .

We then further investigated the downstream signal of PKA, by examining the expression and the nuclear translocation of MSN2. We constructed an endogenous EGFP-labeled MSN2 in both wild-type and  $SUL1\Delta$  strains. These strains were then

cultured in log phase and subjected to DAPI staining to assess nuclear localization (Fig. 3C). The ratio of fluorescence intensity (FI) in the nucleus vs. that in the whole cell was then calculated for each individual cell. We observed that the *SUL1* $\Delta$  strain exhibited significantly increased nuclear accumulation of MSN2-EGFP protein compared to the wild type strain (Fig. 3D).

To examine the potential changes in the amount of MSN2 protein during the aging process, we utilized a microfluidic device to dynamically monitor the expression of EGFP-tagged MSN2 in individual cells, in both the *SUL1* $\Delta$  and the wild-type strains (Fig. 3E). We did not observe notable changes of the total amount of MSN2 protein in individual cells in the *SUL1* $\Delta$  strain compared to the wild-type strain (Supplementary Fig. S1).

However, we did observe significant increase of nuclear localization of MSN2 over the whole lifespan in the *SUL1* $\Delta$  strain relative to the wild type strain (Fig. 3F-G). The *SUL1* mutant exhibited a more pronounced change in the nuclear/whole cell MSN2 ratio as the cells age (Fig. 3F). It is worth noting that in the early and middle life stages, specifically prior to the 17<sup>th</sup> generation, there was a notable difference in the nuclear/whole cell MSN2 ratios observed between the two strains. This difference became less significant for the cells passing 17 generations (Fig. 3G), possibly due to smaller number of cells that are still alive (25 in the mutant strain and 10 in the wild type strain) (Fig. 3F).

In summary, our findings indicate that the deletion of *SUL1* results in a decrease in PKA activity and increase in the nuclear localization of MSN2 (moving from cytoplasm to nucleus), consequently up-regulating stress response genes.

### **Deletion of *SUL1* promotes the cellular autophagy**

Autophagy is a universal biological process that is required for the lifespan extending effect of various genetic and environmental perturbations (Sampaio-Marques et al., 2014). In light of the downregulation of the PKA signal in the *SUL1* mutant and the upregulation of the vast majority of autophagy genes identified by the transcriptomic analysis (Fig. 4A), we investigated the effect of *SUL1* deletion on

autophagy. We decided to focus on ATG8, initially identified as an essential component of the autophagy machinery (Ichimura et al., 2000) (Paz et al., 2000). We generated EGFP-labeled ATG8 in both wild-type and *SUL1* $\Delta$  strains. Using a microfluidic device to monitor the dynamic expression of EGFP-tagged ATG8 in individual cells in the *SUL1* $\Delta$  and the wild-type strains, we found that ATG8 levels steadily increase with age in the *SUL1* $\Delta$  strains, but not in the wide type strain (Fig. 4B and 4C). Additionally, a statistically significant difference in ATG8 expression was observed between *SUL1* $\Delta$  and wild-type strains during the middle and late stages of life (Fig. 4D).

To further examine the difference in autophagy response between the *SUL1* $\Delta$  and the wild type strains, we introduced glucose restriction as a stress stimulus and dynamically monitored alterations in ATG8 expression before (glucose 2%) and after (glucose 0.05%) the media switch (Fig. 4E). Notably, a more pronounced upregulation of ATG8 expression was observed following glucose restriction in the *SUL1* $\Delta$  strain (Fig. 4F).

In summary, *SUL1* $\Delta$  stain has elevated expression of autophagy genes and is better at up-regulating autophagy in response to aging and nutrient depletion.



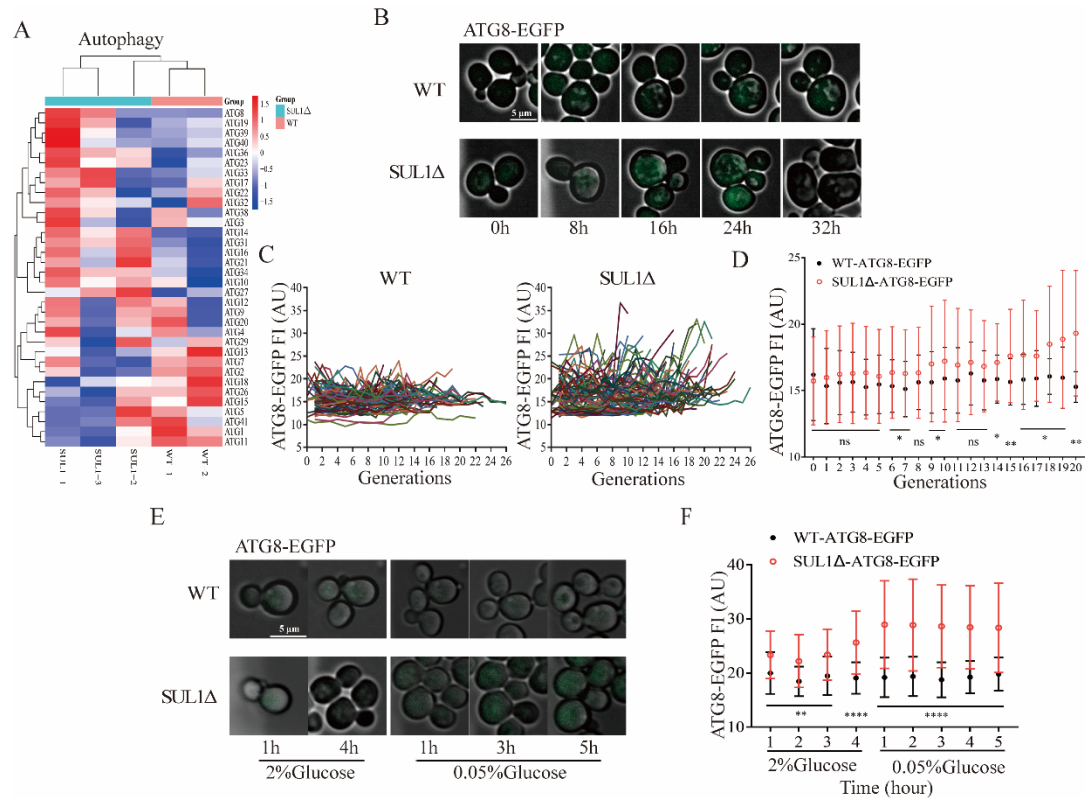

**Figure 4. *SUL1* deletion raises cellular autophagy level.** (A) Heatmap showing changes of autophagy-related genes in WT and *SUL1Δ* strains. (B) Representative time-lapse images of ATG8-EGFP in WT and *SUL1Δ* strains. Scale bars: 5 μm. (C) The normalized fluorescence intensity of ATG8-EGFP as a function of age in the WT and the *SUL1Δ* strains. Each colored curve represents a single cell. (number of cells: WT n = 80; *SUL1Δ* n = 80). (D) Distribution of the fluorescence intensity of ATG8-EGFP as a function of age in the WT and *SUL1Δ* strains. Bars represent mean ± SD, number of cells n = 80. ns: not significant; \*:  $P < 0.05$ ; \*\*:  $P < 0.01$ . (E) Representative time-lapse images of ATG8-EGFP in WT and *SUL1Δ* strains grown in complete synthetic medium (2% glucose) or in glucose restriction medium (0.05% glucose) at the indicated times. Scale bars: 5 μm. (F) Distribution of the fluorescence intensity of ATG8-EGFP in WT and *SUL1Δ* strains grown in complete synthetic medium (2% glucose) or in glucose restriction medium (0.05% glucose) at indicated times. Bars represent mean ± SD; WT: n = 35; *SUL1Δ*: n = 44. \*\*:  $P < 0.01$ ; \*\*\*\*:  $P < 0.0001$ .

### MSN2 and ATG8 are required for the lifespan extension by *SUL1* deletion

Given the observation of the elevated nuclear MSN2 level and a stronger ATG8



response during aging in *SUL1Δ* strain, we further analyzed whether *MNS2* and *ATG8* are required for the lifespan extension by *SUL1* deletion. We compared the RLS of the single mutants *MSN2Δ*, *ATG8Δ*, *SUL1Δ*, and the double mutants *SUL1Δ/MSN2Δ*, and *SUL1Δ/ATG8Δ*. We found that the deletion of *MSN2* or *ATG8* alone neither increase nor decrease lifespan. However, deletion of *MSN2* (Fig. 5A) or *ATG8* (Fig. 5B) in the *SUL1Δ* background partially abolish the lifespan extension of *SUL1* deletion, arguing that the lifespan extension by *Sul1* deletion is at least partially mediated through increased stress response (*Msn2*) and elevated autophagy (*ATG8*).

Our findings suggest a mechanistic model in which the PKA pathway plays a pivotal role in regulating lifespan extension in response to *SUL1* knockdown. The deletion of *SUL1* decreases the activity of the PKA signaling pathway, promoting the accumulation of protective trehalose. By inhibiting ribosome biogenesis, bolstering autophagic capacity, and promoting the translocation of *MSN2* and consequently increased stress response, *SUL1Δ* cells achieve enhanced adaptive stress resistance and increased lifespan (Fig. 5C).

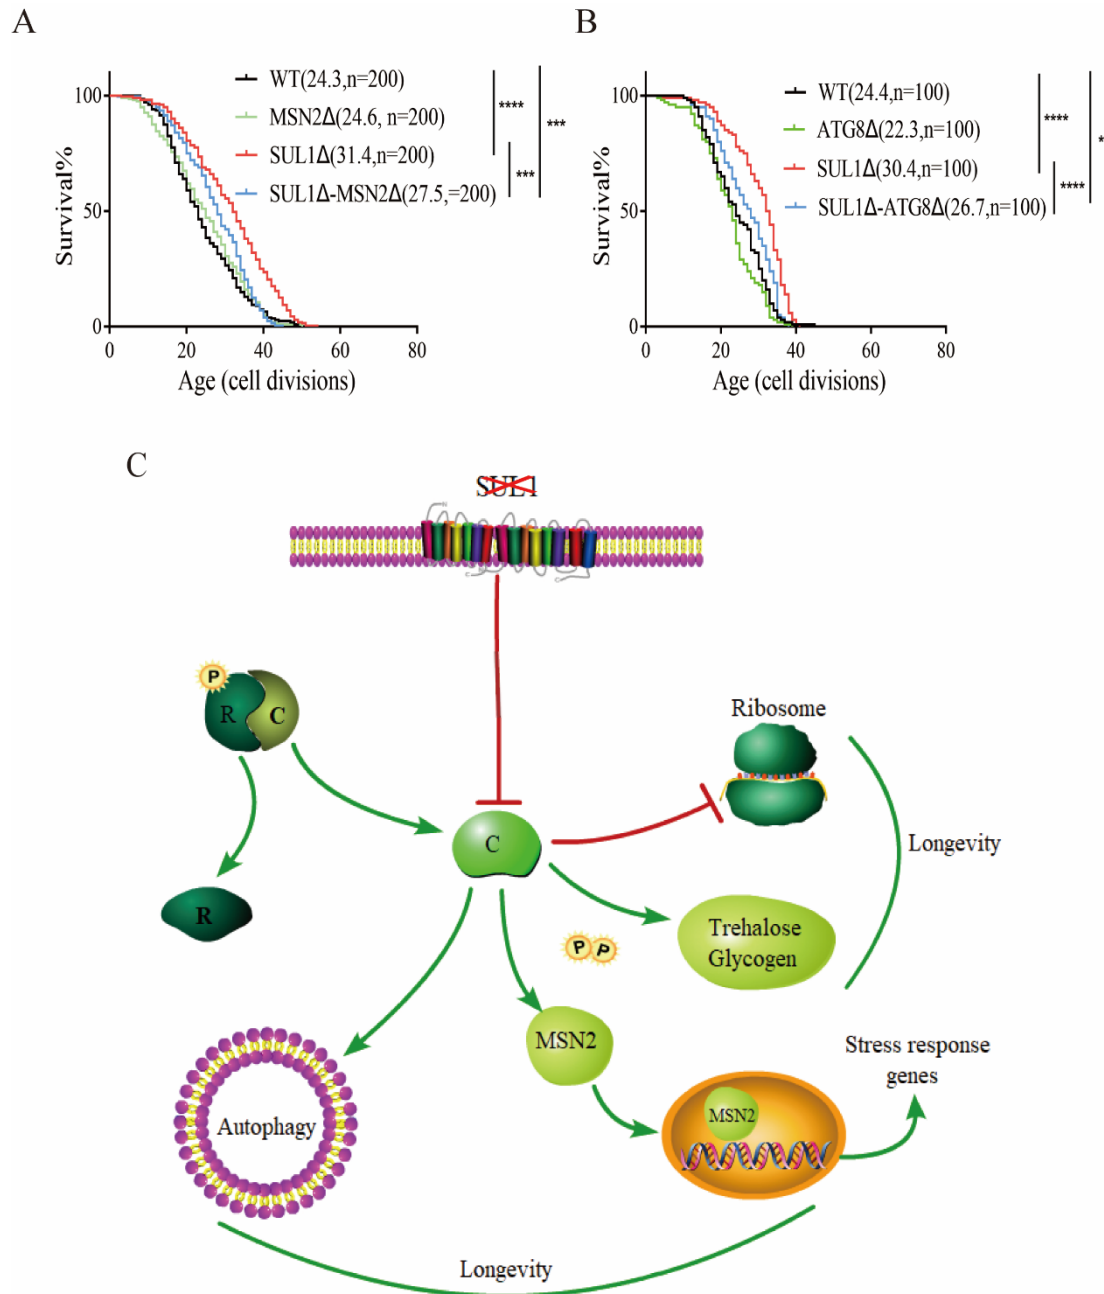

**Figure 5. The effect of SUL1 deletion on longevity is partially mediated by MSN2 and ATG8.**

(A-B) Replicative life span of MSN2 and ATG8 deletion mutants in WT and SUL1Δ strains. The median lifespan is displayed on the graph. (C) A schematic illustrating a mechanistic model of how the deletion of SUL1 extends lifespan. SUL1 deletion leads to decreased PKA activity, resulting in increased nuclear translocation of MSN2 (and consequently increased general stress response), autophagy, trehalose, and decreased ribosome biogenesis. The cumulative impact of these downstream effects collectively contributes to the extension of lifespan. R: PKA regulatory subunit; C: PKA catalytic subunit.

## Discussion

Nutrient transceptors are a class of transporters that have the dual function of transporting nutrient as well as sensing and transducing the signal. They can regulate intracellular signaling cascades that exert a pervasive influence on cellular processes including autophagy, mRNA and ribosome biogenesis, protein synthesis, glucose metabolism, nucleotide and lipid metabolism, proteasomal activity, and stress tolerance (López-Otín et al., 2023). Several nutrient-sensing networks have been shown to be associated with longevity in diverse animal models (Acosta-Rodríguez et al., 2022; Duran-Ortiz et al., 2021; Spadaro et al., 2022). In this study, we provide strong evidence that genetic knockout of SUL1, a sulfate-sensing transceptor, extends the replicative lifespan of *S. cerevisiae* by downregulating PKA signaling to modulate carbohydrate storage, autophagy, ribosome biogenesis, and nuclear translocation of transcription factor MSN2 for general stress response.

Sulfate is transported into the cell of yeast by two high-affinity H-symporters, SUL1 and SUL2 (Breton and Surdin-Kerjan, 1977; Cherest et al., 1997), where it is reduced to sulfide and homocysteine via the sulfate assimilation pathway. These compounds are subsequently incorporated into sulfur-containing molecules, including methionine, cysteine, glutathione, and S-adenosylmethionine (Marzluf, 1997). These sulfur-containing molecules function as intracellular methyl donors and can modulate the lifespan of various species (Gu et al., 2017; Obata and Miura, 2015; Walvekar et al., 2018). Our study revealed, however, that the downregulation of the high-affinity transceptor SUL2 did not result in an increase in lifespan. We show that targeted mutation that abolish the sulfate transporter function of SUL1 while preserving its' signaling function did not extend the lifespan. In addition, disrupting the key enzyme involved in the sulfur assimilation pathway did not extend lifespan.

Our study provided an interesting example where lifespan is regulated by the signal transduction downstream of nutrient sensing, instead of the nutrient itself. This might be more general for other nutrient transceptors, and is worth further investigation. There is also an interesting parallel in multi-cellular organism that the lifespan

extension by caloric restriction can be abolished by smelling the food (Zhang et al., 2021), highlighting the importance of downstream signaling in regulating lifespan.

Deprivation of a single essential nutrient in a fermentative medium decreases PKA activity (Thevelein and de Winde, 1999), leading to the accumulation of reserve and stress protective carbohydrates, glycogen, and trehalose (Lillie and Pringle, 1980). PKA exerts a pivotal role in nutrient regulation of yeast growth and stress tolerance through its regulation of multiple transcription factors and metabolic enzymes (Thevelein and de Winde, 1999). The functions of differentially expressed genes (DEGs) in *SUL1* knockout strains primarily involve RNA-mediated transposition, protein catabolism, carbohydrate metabolism, stress response, cellular amino acid biosynthesis, and ribosome biogenesis, as revealed by our transcriptome analysis. The role of these transposition and metabolic processes in the lifespan extension of *SUL1* requires further investigation.

We identified six transcription factors as important regulators of DEGs in *SUL1Δ* through a computational analysis: *SUA7*, which is required for transcription initiation (Pinto et al., 1994); *IXR1*, which regulates hypoxic genes under normoxia conditions (Brown et al., 1993); *FKH1* and *FKH2*, which regulate the *CLB2* gene cluster during the G2/M phase of the mitotic cell cycle (Bähler, 2005; Jorgensen and Tyers, 2000); *SFP1*, which regulates ribosomal biogenesis (Blumberg and Silver, 1991); and *MSN2*, which orchestrates the general stress response (Schmitt and McEntee, 1996).

In consideration of the diminished activity of the PKA signaling, we specifically focused on *MSN2* as a downstream transcription factor of PKA and observed a unique dynamic pattern of nuclear localization in the *SUL1Δ* strain. Regarding the transcriptional activity of *MSN2*, the *SUL1* mutant exhibited a more robust response to both acute and chronic stimulation. The administration of glucose limitation stimulus, which simulates an acute stress in yeast, resulted in a significant enhancement of *MSN2* nuclear entry (Supplementary Fig. S2). Compared to the wild type, the translocation of *MSN2* into the nucleus was more pronounced in the *SUL1Δ* strain as cells age, indicating that *SUL1* is more sensitive to chronic stresses such as aging-related damage.

In addition to MSN2, MSN4 was initially identified as a PKA controlled transcription factor that regulates stress response and tolerance genes downstream (Görner et al., 1998; Martínez-Pastor et al., 1996). MSN2 and MSN4 regulated the transcription of numerous identical downstream targets by binding to the same stress response element, 5'-CCCCT-3' (Mager and De Kruijff, 1995). In this study, we also analyzed in-depth the nuclear translocation of MSN4 to determine its response to stresses. Interestingly, compared to the wild type, no significant MSN4 nuclear translocation alteration was observed in *SUL1Δ* as a result of aging (Supplementary Fig. S3), indicating that the regulation of stress response capacity of *SUL1Δ* is MSN2-dependent as opposed to MSN4 dependent.

In addition, PKA signaling regulates the initiation of autophagy pathway (Budovskaya et al., 2004), and ATG8 is recruited to an expanding structure and is required for the completion of autophagosome formation (Xie et al., 2008). Our study revealed that autophagy associated with ATG8 contributed to the lifespan extension of *SUL1Δ* strain.

In conclusion, our findings demonstrate that downregulation of *SUL1* inhibits the activity of nutrient-sensing PKA signaling pathway. This regulatory mechanism is responsible for modulating several biological processes, ultimately leading to an increase in the replicative lifespan of yeast. Since PKA pathway and the associated nutrient response is highly conserved across different organisms (Kankipati et al., 2015), our study may have significant implications for the regulation of lifespan in more complex organisms. Further research is needed to clarify the regulatory mechanisms that lead to the weakened PKA signaling pathway following *SUL1* knockdown, uncover additional biological processes that contribute to the lifespan extension, and investigate the complex interactions between the sulfur signaling pathway and other essential nutrient pathways.

## **ACKNOWLEDGEMENTS**

This work was supported by Sichuan Science and Technology Program (No. 2022ZYD0076; No. 2023YFS0050), and the funding supported by Medico-

Engineering Cooperation Funds from the University of Electronic Science and Technology of China and China West Hospital (Grant No. ZYGX2022YGRH018).

## AUTHOR'S CONTRIBUTIONS

J.L., J.Y., H.L. and Y.Z. conceived and designed the experiments. J.L., M.M. and Y.T.C. performed the experiments. J.L. B.G. and J.Y. performed the bioinformatics analysis. J.L., J.Y., H.L. and Y.Z. wrote the manuscript with input from all authors. All authors read and approved the final manuscript.

## COMPETING INTERESTS

Authors declare no competing interests in this paper.

## References

- Acosta-Rodríguez, V., Rijo-Ferreira, F., Izumo, M., Xu, P., Wight-Carter, M., Green, C.B., Takahashi, J.S., 2022. Circadian alignment of early onset caloric restriction promotes longevity in male C57BL/6J mice. *Science* 376, 1192-1202. <https://doi.org/10.1126/science.abk0297>, PMID: 35511946.
- Bähler, J., 2005. Cell-cycle control of gene expression in budding and fission yeast. *Annu Rev Genet* 39, 69-94. <https://doi.org/10.1146/annurev.genet.39.110304.095808>, PMID: 16285853.
- Blumberg, H., Silver, P., 1991. A split zinc-finger protein is required for normal yeast growth. *Gene* 107, 101-110. [https://doi.org/10.1016/0378-1119\(91\)90302-r](https://doi.org/10.1016/0378-1119(91)90302-r), PMID: 1743508.
- Breton, A., Surdin-Kerjan, Y., 1977. Sulfate uptake in *Saccharomyces cerevisiae*: biochemical and genetic study. *J Bacteriol* 132, 224-232. <https://doi.org/10.1128/jb.132.1.224-232.1977>, PMID: 199574.
- Brown, S.J., Kellett, P.J., Lippard, S.J., 1993. Ixr1, a yeast protein that binds to platinated DNA and confers sensitivity to cisplatin. *Science* 261, 603-605. <https://doi.org/10.1126/science.8342024>, PMID: 8342024.
- Budovskaya, Y.V., Stephan, J.S., Reggiori, F., Klionsky, D.J., Herman, P.K., 2004. The Ras/cAMP-dependent protein kinase signaling pathway regulates an early step of the autophagy process in *Saccharomyces cerevisiae*. *J Biol Chem* 279, 20663-20671. <https://doi.org/10.1074/jbc.M400272200>, PMID: 15016820.
- Carmona, J.J., Michan, S., 2016. Biology of Healthy Aging and Longevity. *Rev Invest Clin* 68, 7-16, PMID: 27028172.
- Chen, K., Shen, W., Zhang, Z., Xiong, F., Ouyang, Q., Luo, C., 2020. Age-dependent decline in stress response capacity revealed by proteins dynamics analysis. *Sci Rep* 10, 15211. <https://doi.org/10.1038/s41598-020-72167-4>, PMID: 32939000.
- Cherest, H., Davidian, J.C., Thomas, D., Benes, V., Ansorge, W., Surdin-Kerjan, Y., 1997. Molecular characterization of two high affinity sulfate transporters in *Saccharomyces cerevisiae*. *Genetics* 145, 627-635. <https://doi.org/10.1093/genetics/145.3.627>, PMID: 9055073.
- Choi, K.M., Kim, S., Kim, S., Lee, H.M., Kaya, A., Chun, B.H., Lee, Y.K., Park, T.S., Lee, C.K., Eyun, S.I., Lee,

- B.C., 2019. Sulfate assimilation regulates hydrogen sulfide production independent of lifespan and reactive oxygen species under methionine restriction condition in yeast. *Aging (Albany NY)* 11, 4254-4273. <https://doi.org/10.18632/aging.102050>, PMID: 31254461.
- Duran-Ortiz, S., List, E.O., Ikeno, Y., Young, J., Basu, R., Bell, S., McHugh, T., Funk, K., Mathes, S., Qian, Y., Kulkarni, P., Yakar, S., Berryman, D.E., Kopchick, J.J., 2021. Growth hormone receptor gene disruption in mature-adult mice improves male insulin sensitivity and extends female lifespan. *Aging Cell* 20, e13506. <https://doi.org/10.1111/ace1.13506>, PMID: 34811874.
- Fan, S.Z., Lin, C.S., Wei, Y.W., Yeh, S.R., Tsai, Y.H., Lee, A.C., Lin, W.S., Wang, P.Y., 2021. Dietary citrate supplementation enhances longevity, metabolic health, and memory performance through promoting ketogenesis. *Aging Cell* 20, e13510. <https://doi.org/10.1111/ace1.13510>, PMID: 34719871.
- Gasch, A.P., Spellman, P.T., Kao, C.M., Carmel-Harel, O., Eisen, M.B., Storz, G., Botstein, D., Brown, P.O., 2000. Genomic expression programs in the response of yeast cells to environmental changes. *Mol Biol Cell* 11, 4241-4257. <https://doi.org/10.1091/mbc.11.12.4241>, PMID: 11102521.
- Giots, F., Donaton, M.C., Thevelein, J.M., 2003. Inorganic phosphate is sensed by specific phosphate carriers and acts in concert with glucose as a nutrient signal for activation of the protein kinase A pathway in the yeast *Saccharomyces cerevisiae*. *Mol Microbiol* 47, 1163-1181. <https://doi.org/10.1046/j.1365-2958.2003.03365.x>, PMID: 12581367.
- González, A., Hall, M.N., 2017. Nutrient sensing and TOR signaling in yeast and mammals. *Embo j* 36, 397-408. <https://doi.org/10.15252/emboj.201696010>, PMID: 28096180.
- Görner, W., Durchschlag, E., Martinez-Pastor, M.T., Estruch, F., Ammerer, G., Hamilton, B., Ruis, H., Schüller, C., 1998. Nuclear localization of the C2H2 zinc finger protein Msn2p is regulated by stress and protein kinase A activity. *Genes Dev* 12, 586-597. <https://doi.org/10.1101/gad.12.4.586>, PMID: 9472026.
- Green, C.L., Lamming, D.W., Fontana, L., 2022. Molecular mechanisms of dietary restriction promoting health and longevity. *Nat Rev Mol Cell Biol* 23, 56-73. <https://doi.org/10.1038/s41580-021-00411-4>, PMID: 34518687.
- Gu, X., Orozco, J.M., Saxton, R.A., Condon, K.J., Liu, G.Y., Krawczyk, P.A., Scaria, S.M., Harper, J.W., Gygi, S.P., Sabatini, D.M., 2017. SAMTOR is an S-adenosylmethionine sensor for the mTORC1 pathway. *Science* 358, 813-818. <https://doi.org/10.1126/science.aao3265>, PMID: 29123071.
- Hyde, R., Cwiklinski, E.L., MacAulay, K., Taylor, P.M., Hundal, H.S., 2007. Distinct sensor pathways in the hierarchical control of SNAT2, a putative amino acid transceptor, by amino acid availability. *J Biol Chem* 282, 19788-19798. <https://doi.org/10.1074/jbc.M611520200>, PMID: 17488712.
- Ichimura, Y., Kirisako, T., Takao, T., Satomi, Y., Shimonishi, Y., Ishihara, N., Mizushima, N., Tanida, I., Kominami, E., Ohsumi, M., Noda, T., Ohsumi, Y., 2000. A ubiquitin-like system mediates protein lipidation. *Nature* 408, 488-492. <https://doi.org/10.1038/35044114>, PMID: 11100732.
- Jorgensen, P., Tyers, M., 2000. The fork'ed path to mitosis. *Genome Biol* 1, Reviews1022. <https://doi.org/10.1186/gb-2000-1-3-reviews1022>, PMID: 11277966.
- Kankipati, H.N., Rubio-Teixeira, M., Castermans, D., Diallinas, G., Thevelein, J.M., 2015. Sul1 and Sul2 sulfate transceptors signal to protein kinase A upon exit of sulfur starvation. *J Biol Chem* 290, 10430-10446. <https://doi.org/10.1074/jbc.M114.629022>, PMID: 25724649.
- Khurana, O.K., Coupland, L.A., Shelden, M.C., Howitt, S.M., 2000. Homologous mutations in two diverse sulphate transporters have similar effects. *FEBS Lett* 477, 118-122. [https://doi.org/10.1016/s0014-5793\(00\)01783-x](https://doi.org/10.1016/s0014-5793(00)01783-x), PMID: 10899321.
- La Grotta, R., Frigé, C., Matakchione, G., Olivieri, F., de Candia, P., Ceriello, A., Prattichizzo, F., 2022.



- Repurposing SGLT-2 Inhibitors to Target Aging: Available Evidence and Molecular Mechanisms. *Int J Mol Sci* 23. <https://doi.org/10.3390/ijms232012325>, PMID: 36293181.
- Lillie, S.H., Pringle, J.R., 1980. Reserve carbohydrate metabolism in *Saccharomyces cerevisiae*: responses to nutrient limitation. *J Bacteriol* 143, 1384-1394. <https://doi.org/10.1128/jb.143.3.1384-1394.1980>, PMID: 6997270.
- Lin, S.J., Defossez, P.A., Guarente, L., 2000. Requirement of NAD and SIR2 for life-span extension by calorie restriction in *Saccharomyces cerevisiae*. *Science* 289, 2126-2128. <https://doi.org/10.1126/science.289.5487.2126>, PMID: 11000115.
- Loewith, R., Hall, M.N., 2011. Target of rapamycin (TOR) in nutrient signaling and growth control. *Genetics* 189, 1177-1201. <https://doi.org/10.1534/genetics.111.133363>, PMID: 22174183.
- López-Otín, C., Blasco, M.A., Partridge, L., Serrano, M., Kroemer, G., 2023. Hallmarks of aging: An expanding universe. *Cell* 186, 243-278. <https://doi.org/10.1016/j.cell.2022.11.001>, PMID: 36599349.
- Mager, W.H., De Kruijff, A.J., 1995. Stress-induced transcriptional activation. *Microbiol Rev* 59, 506-531. <https://doi.org/10.1128/mr.59.3.506-531.1995>, PMID: 7565416.
- Martens, Y.A., Zhao, N., Liu, C.C., Kanekiyo, T., Yang, A.J., Goate, A.M., Holtzman, D.M., Bu, G., 2022. ApoE Cascade Hypothesis in the pathogenesis of Alzheimer's disease and related dementias. *Neuron* 110, 1304-1317. <https://doi.org/10.1016/j.neuron.2022.03.004>, PMID: 35298921.
- Martínez-Pastor, M.T., Marchler, G., Schüller, C., Marchler-Bauer, A., Ruis, H., Estruch, F., 1996. The *Saccharomyces cerevisiae* zinc finger proteins Msn2p and Msn4p are required for transcriptional induction through the stress response element (STRE). *Embo j* 15, 2227-2235, PMID: 8641288.
- Marzluf, G.A., 1997. Molecular genetics of sulfur assimilation in filamentous fungi and yeast. *Annu Rev Microbiol* 51, 73-96. <https://doi.org/10.1146/annurev.micro.51.1.73>, PMID: 9343344.
- Maw, G.A., 1963. THE UPTAKE OF INORGANIC SULPHATE BY A BREWER'S YEAST. *Folia Microbiol (Praha)* 40, 325-332. <https://doi.org/10.1007/bf02906029>, PMID: 14061866.
- McCormick, M.A., Delaney, J.R., Tsuchiya, M., Tsuchiyama, S., Shemorry, A., Sim, S., Chou, A.C., Ahmed, U., Carr, D., Murakami, C.J., Schleit, J., Sutphin, G.L., Wasko, B.M., Bennett, C.F., Wang, A.M., Olsen, B., Beyer, R.P., Bammler, T.K., Prunkard, D., Johnson, S.C., Pennypacker, J.K., An, E., Anies, A., Castanza, A.S., Choi, E., Dang, N., Enerio, S., Fletcher, M., Fox, L., Goswami, S., Higgins, S.A., Holmberg, M.A., Hu, D., Hui, J., Jelic, M., Jeong, K.S., Johnston, E., Kerr, E.O., Kim, J., Kim, D., Kirkland, K., Klum, S., Kotireddy, S., Liao, E., Lim, M., Lin, M.S., Lo, W.C., Lockshon, D., Miller, H.A., Moller, R.M., Muller, B., Oakes, J., Pak, D.N., Peng, Z.J., Pham, K.M., Pollard, T.G., Pradeep, P., Pruett, D., Rai, D., Robison, B., Rodriguez, A.A., Ros, B., Sage, M., Singh, M.K., Smith, E.D., Snead, K., Solanky, A., Spector, B.L., Steffen, K.K., Tchao, B.N., Ting, M.K., Vander Wende, H., Wang, D., Welton, K.L., Westman, E.A., Brem, R.B., Liu, X.G., Suh, Y., Zhou, Z., Kaeberlein, M., Kennedy, B.K., 2015. A Comprehensive Analysis of Replicative Lifespan in 4,698 Single-Gene Deletion Strains Uncovers Conserved Mechanisms of Aging. *Cell Metab* 22, 895-906. <https://doi.org/10.1016/j.cmet.2015.09.008>, PMID: 26456335.
- Obata, F., Miura, M., 2015. Enhancing S-adenosyl-methionine catabolism extends *Drosophila* lifespan. *Nat Commun* 6, 8332. <https://doi.org/10.1038/ncomms9332>, PMID: 26383889.
- Paz, Y., Elazar, Z., Fass, D., 2000. Structure of GATE-16, membrane transport modulator and mammalian ortholog of autophagocytosis factor Aut7p. *J Biol Chem* 275, 25445-25450. <https://doi.org/10.1074/jbc.C000307200>, PMID: 10856287.
- Pérez-Torras, S., Vidal-Pla, A., Cano-Soldado, P., Huber-Ruano, I., Mazo, A., Pastor-Anglada, M., 2013. Concentrative nucleoside transporter 1 (hCNT1) promotes phenotypic changes relevant to tumor biology in a translocation-independent manner. *Cell Death Dis* 4, e648.



<https://doi.org/10.1038/cddis.2013.173>, PMID: 23722537.

Pfanzagl, V., Görner, W., Radolf, M., Parich, A., Schuhmacher, R., Strauss, J., Reiter, W., Schüller, C., 2018. A constitutive active allele of the transcription factor Msn2 mimicking low PKA activity dictates metabolic remodeling in yeast. *Mol Biol Cell* 29, 2848-2862. <https://doi.org/10.1091/mbc.E18-06-0389>, PMID: 30256697.

Pinto, I., Wu, W.H., Na, J.G., Hampsey, M., 1994. Characterization of sua7 mutations defines a domain of TFIIB involved in transcription start site selection in yeast. *J Biol Chem* 269, 30569-30573, PMID: 7982976.

Sampaio-Marques, B., Burhans, W.C., Ludovico, P., 2014. Longevity pathways and maintenance of the proteome: the role of autophagy and mitophagy during yeast ageing. *Microb Cell* 1, 118-127. <https://doi.org/10.15698/mic2014.04.136>, PMID: 28357232.

Schepers, W., Van Zeebroeck, G., Pinkse, M., Verhaert, P., Thevelein, J.M., 2012. In vivo phosphorylation of Ser21 and Ser83 during nutrient-induced activation of the yeast protein kinase A (PKA) target trehalase. *J Biol Chem* 287, 44130-44142. <https://doi.org/10.1074/jbc.M112.421503>, PMID: 23155055.

Schmitt, A.P., McEntee, K., 1996. Msn2p, a zinc finger DNA-binding protein, is the transcriptional activator of the multistress response in *Saccharomyces cerevisiae*. *Proc Natl Acad Sci U S A* 93, 5777-5782. <https://doi.org/10.1073/pnas.93.12.5777>, PMID: 8650168.

Schothorst, J., Zeebroeck, G.V., Thevelein, J.M., 2017. Identification of Ftr1 and Zrt1 as iron and zinc micronutrient transceptors for activation of the PKA pathway in *Saccharomyces cerevisiae*. *Microb Cell* 4, 74-89. <https://doi.org/10.15698/mic2017.03.561>, PMID: 28357393.

Shang, P., Valapala, M., Grebe, R., Hose, S., Ghosh, S., Bhutto, I.A., Handa, J.T., Luty, G.A., Lu, L., Wan, J., Qian, J., Sergeev, Y., Puertollano, R., Zigler, J.S., Jr., Xu, G.T., Sinha, D., 2017. The amino acid transporter SLC36A4 regulates the amino acid pool in retinal pigmented epithelial cells and mediates the mechanistic target of rapamycin, complex 1 signaling. *Aging Cell* 16, 349-359. <https://doi.org/10.1111/acer.12561>, PMID: 28083894.

Spadaro, O., Youm, Y., Shchukina, I., Ryu, S., Sidorov, S., Ravussin, A., Nguyen, K., Aladyeva, E., Predeus, A.N., Smith, S.R., Ravussin, E., Galban, C., Artyomov, M.N., Dixit, V.D., 2022. Caloric restriction in humans reveals immunometabolic regulators of health span. *Science* 375, 671-677. <https://doi.org/10.1126/science.abg7292>, PMID: 35143297.

Steyfkens, F., Zhang, Z., Van Zeebroeck, G., Thevelein, J.M., 2018. Multiple Transceptors for Macro- and Micro-Nutrients Control Diverse Cellular Properties Through the PKA Pathway in Yeast: A Paradigm for the Rapidly Expanding World of Eukaryotic Nutrient Transceptors Up to Those in Human Cells. *Front Pharmacol* 9, 191. <https://doi.org/10.3389/fphar.2018.00191>, PMID: 29662449.

Sun, J., Nishiyama, T., Shimizu, K., Kadota, K., 2013. TCC: an R package for comparing tag count data with robust normalization strategies. *BMC Bioinformatics* 14, 219. <https://doi.org/10.1186/1471-2105-14-219>, PMID: 23837715.

Thevelein, J.M., de Winde, J.H., 1999. Novel sensing mechanisms and targets for the cAMP-protein kinase A pathway in the yeast *Saccharomyces cerevisiae*. *Mol Microbiol* 33, 904-918. <https://doi.org/10.1046/j.1365-2958.1999.01538.x>, PMID: 10476026.

Thomas, D., Surdin-Kerjan, Y., 1997. Metabolism of sulfur amino acids in *Saccharomyces cerevisiae*. *Microbiol Mol Biol Rev* 61, 503-532. <https://doi.org/10.1128/mubr.61.4.503-532.1997>, PMID: 9409150.

Van Nuland, A., Vandormael, P., Donaton, M., Alenquer, M., Lourenço, A., Quintino, E., Versele, M.,

- Thevelein, J.M., 2006. Ammonium permease-based sensing mechanism for rapid ammonium activation of the protein kinase A pathway in yeast. *Mol Microbiol* 59, 1485-1505. <https://doi.org/10.1111/j.1365-2958.2005.05043.x>, PMID: 16468990.
- Walch-Liu, P., Forde, B.G., 2008. Nitrate signalling mediated by the NRT1.1 nitrate transporter antagonises L-glutamate-induced changes in root architecture. *Plant J* 54, 820-828. <https://doi.org/10.1111/j.1365-313X.2008.03443.x>, PMID: 18266918.
- Walvekar, A.S., Srinivasan, R., Gupta, R., Laxman, S., 2018. Methionine coordinates a hierarchically organized anabolic program enabling proliferation. *Mol Biol Cell* 29, 3183-3200. <https://doi.org/10.1091/mbc.E18-08-0515>, PMID: 30354837.
- Wullschleger, S., Loewith, R., Hall, M.N., 2006. TOR signaling in growth and metabolism. *Cell* 124, 471-484. <https://doi.org/10.1016/j.cell.2006.01.016>, PMID: 16469695.
- Xie, Z., Nair, U., Klionsky, D.J., 2008. Atg8 controls phagophore expansion during autophagosome formation. *Mol Biol Cell* 19, 3290-3298. <https://doi.org/10.1091/mbc.e07-12-1292>, PMID: 18508918.
- Xie, Z., Zhang, Y., Zou, K., Brandman, O., Luo, C., Ouyang, Q., Li, H., 2012. Molecular phenotyping of aging in single yeast cells using a novel microfluidic device. *Aging Cell* 11, 599-606. <https://doi.org/10.1111/j.1474-9726.2012.00821.x>, PMID: 22498653.
- Zhang, B., Jun, H., Wu, J., Liu, J., Xu, X.Z.S., 2021. Olfactory perception of food abundance regulates dietary restriction-mediated longevity via a brain-to-gut signal. *Nat Aging* 1, 255-268. <https://doi.org/10.1038/s43587-021-00039-1>, PMID: 33796867.
- Zhang, N., Cao, L., 2017. Starvation signals in yeast are integrated to coordinate metabolic reprogramming and stress response to ensure longevity. *Curr Genet* 63, 839-843. <https://doi.org/10.1007/s00294-017-0697-4>, PMID: 28444510.
